# Supplementary material
Source: publisher figshare collection journal article supplement (https://acs.figshare.com/ndownloader/files/5137264)
Supplement: Supplementary file 1 [file 5137264]

## **Supporting Information**

### **Mechanism of cytotoxicity of copper(I) complexes of 1,2-bis (diphenylphosphino) ethane**

*Nusrat J. Sanghamitra<sup>1</sup>, Pornima Phatak<sup>2</sup>, Sanjeev Das<sup>2</sup>, Ashoka G. Samuelson<sup>1\*</sup> and Kumaravel Somasundaram<sup>2\*</sup>*

<sup>1</sup>Department of Inorganic and Physical Chemistry and <sup>2</sup>Department of Microbiology and Cell Biology, Indian Institute of Science, Bangalore 560 012

#### **Contents**

Synthesis, <sup>1</sup>H, <sup>31</sup>P NMR and elemental analysis data for the compounds used in the study

**Synthesis,  $^1\text{H}$ ,  $^{31}\text{P}$  NMR and elemental analysis data for the compounds used in the study**

**C1** was synthesized and characterized as previously described <sup>1</sup>.

**$\text{Cu}_2(\text{DPPE})_3(\text{ClO}_4)_2$  (C2)**

DPPE (0.2935 g, 0.735 mmol) was dissolved in 20 ml of  $\text{CH}_2\text{Cl}_2$  and solid  $\text{Cu}(\text{CH}_3\text{CN})_4\text{ClO}_4$  (0.1635 g, 0.5 mmol) was added. After 2 h of stirring, carbazole (0.0835 g, 0.5 mmol) was added followed by 24 h of stirring at room temperature. The complex was precipitated out by concentrating the solution to 5 ml and subsequent addition of diethyl ether (8 ml). The precipitate was washed four times with diethyl ether and dried in vacuo. The presence of carbazole was necessary to generate the complex C4. In the absence of carbazole, C1 was the major product formed.  $^1\text{H}$  NMR ( $\text{CDCl}_3$ ):  $\delta$  2.45(12H  $\text{CH}_2\text{CH}_2$ ), 7.19, 7.3, 7.6,  $^{31}\text{P}$ NMR ( $\text{CDCl}_3$ ):  $\delta$ -5.1, 5.1. IR ( $\nu$  1096  $\text{ClO}_4$ ).

**$\text{Cu}(\text{DPPE})(\text{Benzotriazole})_2\text{ClO}_4$  (C3)**

DPPE (0.199 g, 0.498 mmol) was dissolved in 20 ml of  $\text{CH}_2\text{Cl}_2$  and solid  $\text{Cu}(\text{CH}_3\text{CN})_4\text{ClO}_4$  (0.1635 g, 0.5 mmol) was added. After 2 h of stirring, benzotriazole (0.0595 g, 0.5 mmol) was added followed by 24 h of stirring at room temperature. The complex was isolated as above.  $^1\text{H}$  NMR ( $\text{CDCl}_3$ ):  $\delta$  2.43 (bs, 4H,  $\text{CH}_2\text{CH}_2$ ), 7.6 (4H Bz), 7.3, 7.2.  $^{31}\text{P}$  NMR ( $\text{CDCl}_3$ ):  $\delta$  -8.5 (s) 5.4(b).. IR (KBr pellet): 1099 ( $\nu$   $\text{ClO}_4$ ).

**$\text{Cu}_2(\text{DPPE})_3(\text{Benzotriazole})_2(\text{ClO}_4)_2$  (C4)**

C4 was synthesized from  $\text{Cu}(\text{CH}_3\text{CN})_4\text{ClO}_4$  using benzotriazole following the procedure used for synthesis of C3. Benzotriazole was however found coordinated to copper (I).  $^1\text{H}$  NMR ( $\text{CDCl}_3$ ):  $\delta$  2.445(bs, 4H,  $\text{CH}_2\text{CH}_2$ ), 7.64, 7.3, 7.18.  $^{31}\text{P}$  NMR ( $\text{CDCl}_3$ ):  $\delta$  -8.3 (s) – 4.7, 6.2 (b). IR (KBr pellet): 1090 ( $\nu$   $\text{ClO}_4$ ).

### Analytical Data in Tabular Form

| Complex<br>Formula                           | C      |       | H       |       | N      |       |
|----------------------------------------------|--------|-------|---------|-------|--------|-------|
|                                              | Calcd. | Found | Calcd.  | Found | Calcd. | Found |
| <b>C2</b><br>$C_{78}H_{48}Cu_2P_6Cl_2O_8$    | 55.63  | 55.36 | H, 4.37 | 4.35  |        |       |
| <b>C3</b><br>$C_{38}H_{34}N_6CuP_2ClO_4$     | 57.08  | 56.04 | 4.29    | 4.44  | 10.50  | 9.20  |
| <b>C4</b><br>$C_{90}H_{82}N_6P_6Cu_2Cl_2O_8$ | 59.26  | 59.35 | 4.59    | 4.73  | 4.55   | 3.41  |

### Reference:

Vijayashree, N.; Samuelson, A.G.; Nethaji M.; 1,2-bis(diphenylphosphino)ethane(dppe) bridged dinuclear copper(I) complexes : Investigations of solid state and solution structures by CP/MAS  $^{31}P$  NMR spectroscopy, X-ray crystallography, IR spectroscopy and solution  $^{31}P$  and  $^{65}Cu$  NMR spectroscopy. *Current Science*, **1993**, 65, 57-67.
